# Supplementary material
Source: PubMed Central journal article supplement (PMC2893244)
Supplement: NIHMS205242-supplement-1.pdf [file NIHMS205242-supplement-1.pdf]

## A. List of Supplementary Figures and Tables

**Figure S1** The glucosylceramide pathway mutants grow normally at neutral and alkaline pH

**Figure S2** Variability in the infectivity assay

**Table S1** *C. albicans* mutants with previously reported virulence and morphogenesis phenotypes

**Table S2** *C. albicans* with previously reported virulence and kidney burden phenotypes

**Table S3** Results of the Infectivity, Morphogenesis, and Proliferation Screens (Excel file)

**Table S4** Mutants with abnormal infectivity (Excel file)

**Table S5** Mutants with abnormal morphogenesis (M score >1) (Excel file)

**Table S6** Analysis of hyphal formation among infectivity-defective mutants

**Table S7** Analysis of chromosome ploidy in 12 mutants and the parent strain by quantitative PCR

**Table S8** Primers used for mutant construction and validation (Excel file)

**Table S9** *C. albicans* strains used in this study

**Table S10**  $\log_2(R/I)$  ratios of mutants tested in the infectivity screen (Excel file)

**Table S11**  $\log_2(R/I)$  ratios of wild type *C. albicans* tested in the infectivity screen (Excel file)

**Table S12** *C. albicans* mutants with reported virulence phenotypes that were recreated in this study

## B. Legends for Supplementary Tables in Excel

**Table S4. Mutants with abnormal infectivity.** Data are presented for the 115 mutants that displayed abnormal infectivity phenotypes, as defined in the text. Mutant is the code for each gene knockout in the homozygous gene disruption library. Systematic name is the systematic numerical designation for the disrupted gene. Gene name is the standard name for named ORFs, as they appear in the Candida Genome Database. Process is the known or predicted cellular process associated with the protein encoded by the disrupted gene. Activity is the known or predicted function of the protein encoded by the disrupted gene; predictions were based on closest BLAST hits and/or SMART motifs. Under Infectivity, t-test p value is the t test result of comparing  $\log_2(R/I)$  measurements for each mutant with those of wild type *C. albicans* across the screen, and Median (R/I) is the R/I corresponding to the median  $\log_2(R/I)$  value of each mutant. Under Morphology, C represents the morphology of the center of a colony for a particular mutant grown on Spider medium for 14 days, compared to that of wild type *C. albicans*, and can range from -3 (hypofilamentous) through 0 (wild type) to 3 (hyperfilamentous), as described in the text. P represents the periphery of the colony. M score is the absolute value of C plus P. DT is the doubling time in minutes of each mutant in Synthetic Complete liquid medium at 37°C. Published virulence phenotype is the reported phenotype of a mutant in the tail vein model of disseminated Candidiasis, and PMID is the PubMed unique identifier for the reference.

**Table S10.  $\log_2(R/I)$  ratios of mutants tested in the infectivity screen.** Rows correspond to data from individual mutants. Columns give the identity of the mutant in the library, the systematic name of the deleted gene, and  $\log_2(R/I)$  values from separate experiments. Note that some mutants have more than 6 values. Mutants numbering 1-96 were tested multiple times while the assay was vetted. In addition, data were combined if mutants with different numbers were subsequently discovered to target the same gene. Mutants have fewer than 6 values if some of the quantitative PCR reactions failed.

### C. Supplementary References

1. Aono, R. Taxonomic distribution of alkali-tolerant yeasts. *Syst Appl Microbiol* **13**, 394-397 (1990).
2. Saito, K., Takakuwa, N., Ohnishi, M. & Oda, Y. Presence of glucosylceramide in yeast and its relation to alkali tolerance of yeast. *Appl Microbiol Biotechnol* **71**, 515-21 (2006).
3. Arbour, M. et al. Widespread occurrence of chromosomal aneuploidy following the routine production of *Candida albicans* mutants. *FEMS Yeast Research* **9**, 1070-7 (2009).

### D. Supplementary Figures and Tables

# Figure S1

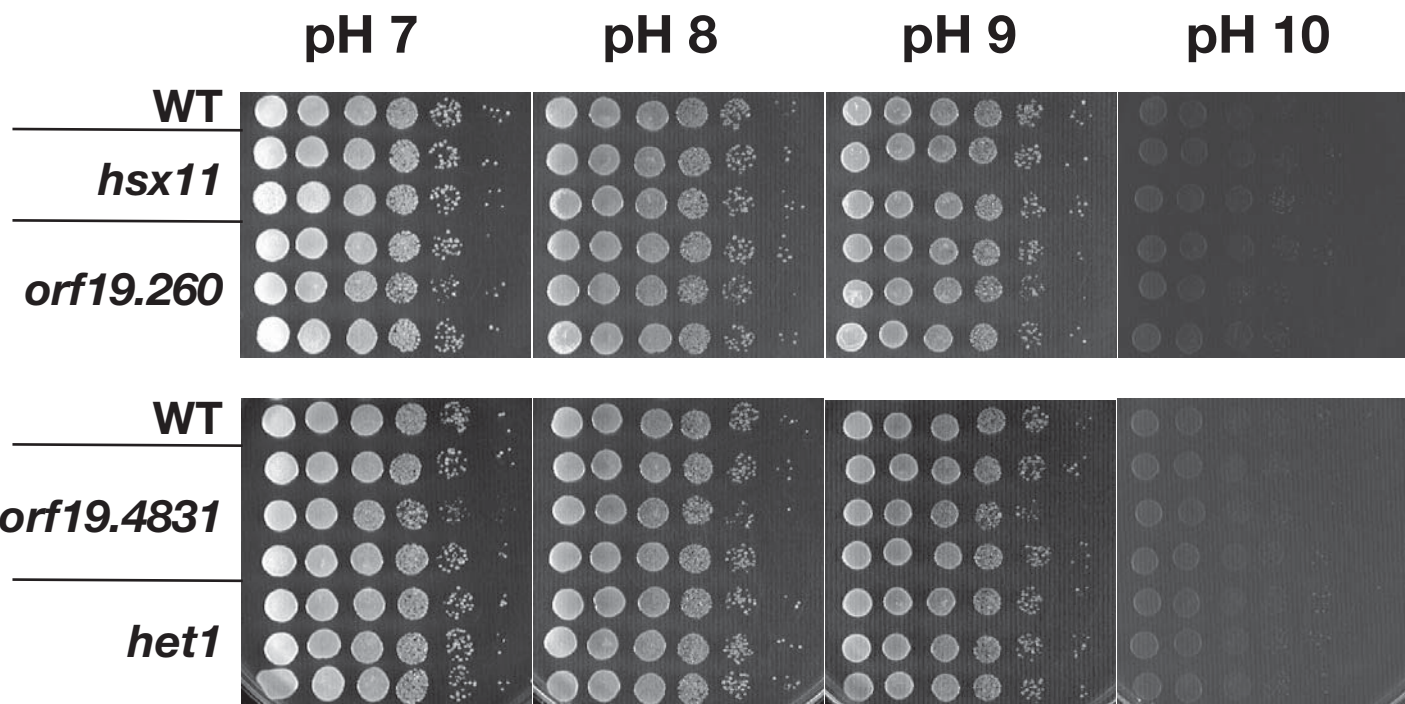

**The glucosylceramide pathway mutants grow normally at neutral and alkaline pH.**

The glucosylceramide pathway mutants and wild type *C. albicans* were spotted onto plates buffered at neutral and alkaline pH and allowed to grow at 37°C in the presence of 5% CO<sub>2</sub>, as described.<sup>1,2</sup>

# Figure S2

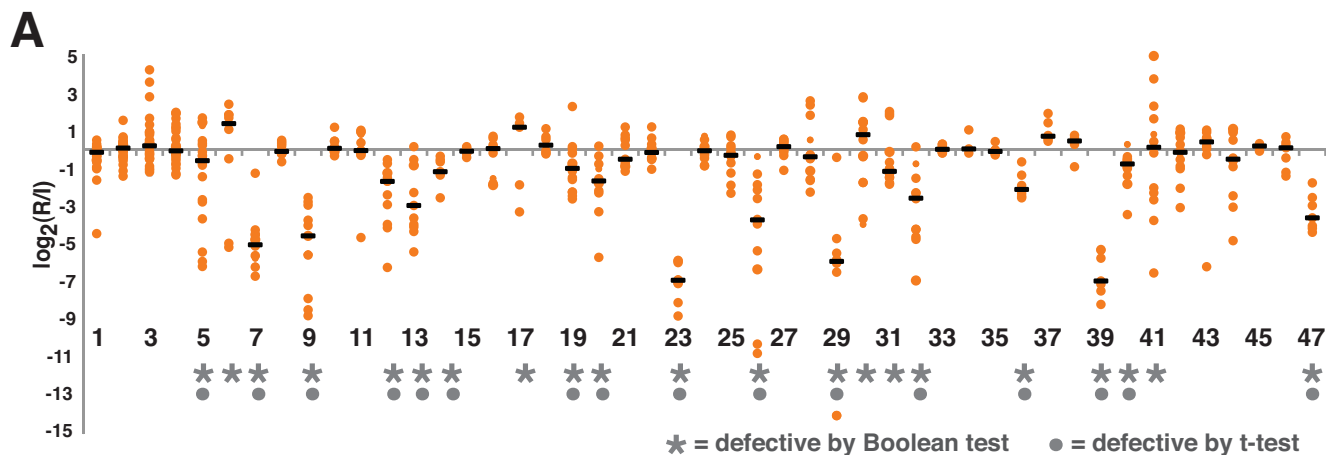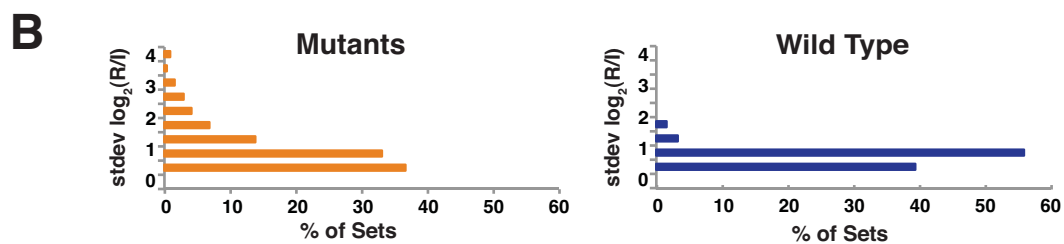

## Figure S2. Statistical tests and variability in the infectivity assay.

A) This version of Figure 2C designates which infectivity-defective mutants were detected by Boolean criteria (grey asterisks) versus the t-test (grey dots). Orange circles represent the  $\log_2(R/I)$  values from individual strains in different mice. Black bars represent the median  $\log_2(R/I)$  value for each mutant. Mutants in this set were newly constructed isolates of 47 published strains previously reported to have virulence defects in the murine model of disseminated candidiasis. Mutants 1-47 were homozygous disruptants of *LIP8*, *NAG1*, *DAC1*, *HWP2*, *AAF1*, *KRE5*, *CDC10*, *SAP7*, *HOG1*, *CHK1*, *MNS1*, *MAD2*, *INP51*, *UTR2*, *RAS1*, *YPT72*, *CHS7*, *CEK1*, *MTLA1*, *CDC19*, *YHB1*, *YHB5*, *PHR1*, *GLN3*, *CST20*, *HSL1*, *PHO100*, *CAS5*, *KEX2*, *PTC1*, *CPP1*, *CLA4*, *NIK1*, *SIT4*, *IFF11*, *PEP7*, *SAP1*, *SAP3*, *ACE2*, *RBT4*, *NRG1*, *RIM101*, *CTA4*, *OCH1*, *IFF4*, *MKC1*, and *RFG1*, respectively.

B) Variability in the infectivity assay. Standard deviations in  $\log_2(R/I)$  are presented for the first 6 measurements of each mutant and randomly generated sets of 6 ratios from the wild type dataset.

**Table S1 *C. albicans* mutants with previously reported virulence and morphogenesis phenotypes**

| Systematic name | Gene name    | Virulence phenotype  | Reference                   | Morphology phenotype         | Reference     |
|-----------------|--------------|----------------------|-----------------------------|------------------------------|---------------|
| orf19.1036      | <i>MNS1</i>  | Virulence defect     | PMID:17933909               | Filamentous growth abnormal  | PMID:17933909 |
| orf19.1093      | <i>FLO8</i>  | Virulence defect     | PMID:16267276               | Hyphal growth abnormal       | PMID:16267276 |
| orf19.1161      | <i>PLD1</i>  | Virulence defect     | PMID:15552646               | Hyphal growth abnormal       | PMID:11283284 |
| orf19.1275      | <i>GAT1</i>  | Virulence defect*    | PMID:14617156               | Wild-type hyphal growth*     | PMID:14617156 |
| orf19.1321      | <i>HWP1</i>  | Wild-type virulence  | PMID:15817775               | Wild-type filamentous growth | PMID:15817775 |
| orf19.1358      | <i>GCN4</i>  | Wild-type virulence* | PMID:15302823               | Filamentous growth abnormal* | PMID:15701793 |
| orf19.1373      | <i>INP51</i> | Virulence defect     | PMID:18957583               | Hyphal growth abnormal       | PMID:18957583 |
| orf19.147       | <i>YAK1</i>  | Wild-type virulence* | PMID:18321992               | Filamentous growth abnormal* | PMID:18321992 |
| orf19.1513      | <i>FAB1</i>  | Wild-type virulence* | PMID:12117957               | Hyphal growth abnormal*      | PMID:12117957 |
| orf19.1526      | <i>SNF2</i>  | Virulence defect     | PMID:16647065               | Hyphal growth abnormal       | PMID:16647065 |
| orf19.1598      | <i>ERG24</i> | Virulence defect     | PMID:11897574               | Hyphal growth abnormal       | PMID:11897574 |
| orf19.1621      | <i>GPA2</i>  | Wild-type virulence* | PMID:15302825               | Filamentous growth abnormal* | PMID:15302825 |
| orf19.1671      | <i>UTR2</i>  | Virulence defect     | PMID:15042589 PMID:17074760 | Hyphal growth abnormal       | PMID:15042589 |
| orf19.1716      | <i>URA3</i>  | Virulence defect     | PMID:14500538               | Hyphal growth abnormal       | PMID:14500538 |
| orf19.1760      | <i>RAS1</i>  | Virulence defect     | PMID:11722734               | Hyphal growth abnormal       | PMID:10515923 |
| orf19.1779      | <i>MP65</i>  | Virulence defect     | PMID:17217426               | Hyphal growth abnormal       | PMID:17217426 |
| orf19.1822      | <i>UME6</i>  | Virulence defect     | PMID:19054126               | Hyphal growth abnormal       | PMID:19054126 |
| orf19.2012      | <i>NOT3</i>  | Wild-type virulence* | PMID:14500538               | Hyphal growth abnormal*      | PMID:14500538 |
| orf19.2154      | <i>HXK1</i>  | Virulence defect     | PMID:11298769               | Hyphal growth abnormal       | PMID:11298769 |
| orf19.2156      | <i>NAG1</i>  | Virulence defect     | PMID:11298769               | Hyphal growth abnormal       | PMID:11298769 |
| orf19.2157      | <i>DAC1</i>  | Virulence defect     | PMID:11298769               | Hyphal growth abnormal       | PMID:11298769 |
| orf19.2179      | <i>SIT1</i>  | Wild-type virulence  | PMID:12060662 PMID:12183576 | Wild-type hyphal growth      | PMID:12183576 |
| orf19.2245      | <i>YPT72</i> | Virulence defect     | PMID:19364843               | Filamentous growth abnormal  | PMID:19364843 |
| orf19.2277      | <i>TPK2</i>  | Virulence defect     | PMID:10652099               | Hyphal growth abnormal       | PMID:10652099 |
| orf19.2334      | <i>BIG1</i>  | Virulence defect     | PMID:16552067               | Hyphal growth abnormal       | PMID:16552067 |
| orf19.2347      | <i>MNN2</i>  | Virulence defect     | PMID:16467465               | Hyphal growth abnormal       | PMID:16467465 |
| orf19.2379      | <i>NOT4</i>  | Virulence defect     | PMID:14702416               | Hyphal growth abnormal       | PMID:14702416 |

|              |              |                      |                             |                              |               |
|--------------|--------------|----------------------|-----------------------------|------------------------------|---------------|
| orf19.2444   | <i>CHS7</i>  | Virulence defect     | PMID:16079341               | Filamentous growth abnormal  | PMID:16079341 |
| orf19.2614   | <i>RSR1</i>  | Virulence defect     | PMID:9308185                | Hyphal growth abnormal       | PMID:9308185  |
| orf19.2770.1 | <i>SOD1</i>  | Virulence defect     | PMID:12427960               | Hyphal growth abnormal       | PMID:12427960 |
| orf19.2809   | <i>CTN3</i>  | Wild-type virulence  | PMID:18227254               | Wild-type hyphal growth      | PMID:18227254 |
| orf19.2823   | <i>RFG1</i>  | Virulence defect     | PMID:11259598               | Filamentous growth abnormal  | PMID:11259598 |
| orf19.2849   | <i>AQY1</i>  | Wild-type virulence  | PMID:11746601               | Wild-type hyphal growth      | PMID:11746601 |
| orf19.2881   | <i>MNN4</i>  | Wild-type virulence  | PMID:15271989               | Wild-type hyphal growth      | PMID:15271989 |
| orf19.2886   | <i>CEK1</i>  | Virulence defect     | PMID:9596738                | Hyphal growth abnormal       | PMID:9596738  |
| orf19.290    | <i>KRE5</i>  | Virulence defect     | PMID:15590817               | Hyphal growth abnormal       | PMID:15590817 |
| orf19.2972   | <i>PDE2</i>  | Virulence defect     | PMID:17614954               | Filamentous growth abnormal  | PMID:14523128 |
| orf19.3010.1 | <i>ECM33</i> | Virulence defect     | PMID:15470113 PMID:18546157 | Hyphal growth abnormal       | PMID:15470113 |
| orf19.3256   | <i>SLN1</i>  | Virulence defect     | PMID:10572127               | Hyphal growth abnormal       | PMID:10572127 |
| orf19.3340   | <i>SOD2</i>  | Wild-type virulence  | PMID:12898709               | Wild-type hyphal growth      | PMID:12898709 |
| orf19.3366   | <i>CSH3</i>  | Virulence defect     | PMID:14756779               | Hyphal growth abnormal       | PMID:14756779 |
| orf19.3523   | <i>CRK1</i>  | Virulence defect     | PMID:11073971               | Hyphal growth abnormal       | PMID:11073971 |
| orf19.3524   | <i>CRK1</i>  | Virulence defect     | PMID:11073971               | Filamentous growth abnormal  | PMID:12773383 |
| orf19.3642   | <i>SUN41</i> | Virulence defect     | PMID:17873081               | Hyphal growth abnormal       | PMID:17905924 |
| orf19.3680   | <i>SEP7</i>  | Wild-type virulence* | PMID:12819094               | Hyphal growth abnormal*      | PMID:12819094 |
| orf19.3707   | <i>YHB1</i>  | Virulence defect     | PMID:15189992               | Filamentous growth abnormal  | PMID:16030247 |
| orf19.3802   | <i>PMT6</i>  | Virulence defect     | PMID:10809683               | Hyphal growth abnormal       | PMID:15659169 |
| orf19.3829   | <i>PHR1</i>  | Virulence defect     | PMID:7591097                | Filamentous growth abnormal  | PMID:10974097 |
| orf19.3912   | <i>GLN3</i>  | Virulence defect     | PMID:17950010               | Filamentous growth abnormal  | PMID:17369441 |
| orf19.4064   | <i>GPI7</i>  | Virulence defect     | PMID:11994163               | Hyphal growth abnormal       | PMID:11994163 |
| orf19.4109   | <i>PMT4</i>  | Virulence defect     | PMID:15659169               | Hyphal growth abnormal       | PMID:15659169 |
| orf19.4208   | <i>RAD52</i> | Virulence defect     | PMID:16299301               | Filamentous growth abnormal  | PMID:16468988 |
| orf19.4242   | <i>CST20</i> | Virulence defect     | PMID:8917571                | Hyphal growth abnormal       | PMID:8917571  |
| orf19.4257   | <i>INT1</i>  | Virulence defect     | PMID:10444345               | Filamentous growth abnormal  | PMID:9478896  |
| orf19.4284   | <i>BUR2</i>  | Wild-type virulence  | PMID:14500538               | Wild-type hyphal growth      | PMID:14500538 |
| orf19.4304   | <i>GAP1</i>  | Wild-type virulence* | PMID:12949183               | Filamentous growth abnormal* | PMID:12949183 |
| orf19.4308   | <i>HSL1</i>  | Virulence defect     | PMID:15659158               | Filamentous growth abnormal  | PMID:15659158 |
| orf19.4339   | <i>VPS4</i>  | Virulence defect     | PMID:18814053               | Filamentous growth           | PMID:15590834 |

|            |               |                      |                             |                             |               |
|------------|---------------|----------------------|-----------------------------|-----------------------------|---------------|
|            |               |                      |                             | abnormal                    |               |
| orf19.4401 | <i>YVH1</i>   | Virulence defect     | PMID:16000712               | Hyphal growth abnormal      | PMID:16000712 |
| orf19.454  | <i>SFL1</i>   | Virulence defect     | PMID:17715361               | Hyphal growth abnormal      | PMID:17715361 |
| orf19.4551 | <i>CTN1</i>   | Wild-type virulence  | PMID:18227254               | Wild-type hyphal growth     | PMID:18227254 |
| orf19.4565 | <i>BGL2</i>   | Virulence defect     | PMID:9043114                | Hyphal growth abnormal      | PMID:9043114  |
| orf19.4590 | <i>RFX2</i>   | Virulence defect     | PMID:19252121               | Filamentous growth abnormal | PMID:19252121 |
| orf19.4591 | <i>CAT2</i>   | Wild-type virulence  | PMID:18281597               | Wild-type hyphal growth     | PMID:18227254 |
| orf19.469  | <i>HST7</i>   | Wild-type virulence* | PMID:8917571                | Hyphal growth abnormal*     | PMID:8917571  |
| orf19.4719 | <i>CWH41</i>  | Virulence defect     | PMID:17933909               | Filamentous growth abnormal | PMID:17933909 |
| orf19.4755 | <i>KEX2</i>   | Virulence defect     | PMID:12419804               | Hyphal growth abnormal      | PMID:9360967  |
| orf19.4773 | <i>AOX2</i>   | Wild-type virulence  | PMID:11368790               | Wild-type hyphal growth     | PMID:11368790 |
| orf19.4774 | <i>AOX1</i>   | Wild-type virulence  | PMID:11368790               | Wild-type hyphal growth     | PMID:11368790 |
| orf19.4785 | <i>PTC1</i>   | Virulence defect     | PMID:18708562               | Hyphal growth abnormal      | PMID:18708562 |
| orf19.4866 | <i>CPP1</i>   | Virulence defect     | PMID:9398674                | Hyphal growth abnormal      | PMID:9398674  |
| orf19.4890 | <i>CLA4</i>   | Virulence defect     | PMID:9259554                | Hyphal growth abnormal      | PMID:9259554  |
| orf19.4927 | <i>BNI1</i>   | Virulence defect     | PMID:15914538               | Filamentous growth abnormal | PMID:16215178 |
| orf19.4958 | <i>ECM25</i>  | Virulence defect     | PMID:18368314               | Filamentous growth abnormal | PMID:18368314 |
| orf19.5031 | <i>SSK1</i>   | Virulence defect     | PMID:10639412               | Hyphal growth abnormal      | PMID:10639412 |
| orf19.505  | <i>SRV2</i>   | Virulence defect     | PMID:11325951               | Filamentous growth abnormal | PMID:11325951 |
| orf19.5061 | <i>ADE5,7</i> | Virulence defect     | PMID:17600079               | Hyphal growth abnormal      | PMID:17600079 |
| orf19.5083 | <i>DRG1</i>   | Virulence defect     | PMID:17159222               | Filamentous growth abnormal | PMID:17159222 |
| orf19.5107 | <i>NOT5</i>   | Virulence defect     | PMID:12787355 PMID:14500538 | Hyphal growth abnormal      | PMID:14500538 |
| orf19.5148 | <i>CYR1</i>   | Virulence defect     | PMID:11694594               | Filamentous growth abnormal | PMID:11694594 |
| orf19.5171 | <i>PMT1</i>   | Virulence defect     | PMID:9694829                | Hyphal growth abnormal      | PMID:15659169 |
| orf19.5181 | <i>NIK1</i>   | Virulence defect     | PMID:11270409 PMID:10572127 | Hyphal growth abnormal      | PMID:9618540  |
| orf19.5200 | <i>SIT4</i>   | Virulence defect     | PMID:14731272               | Hyphal growth abnormal      | PMID:14731272 |
| orf19.5343 | <i>ASH1</i>   | Virulence defect     | PMID:12446785               | Filamentous growth abnormal | PMID:12446785 |
| orf19.548  | <i>CDC10</i>  | Virulence defect     | PMID:12819094               | Hyphal growth abnormal      | PMID:12819094 |
| orf19.5657 | <i>SWI1</i>   | Virulence defect     | PMID:16647065               | Hyphal growth abnormal      | PMID:16647065 |
| orf19.5662 | <i>PEP7</i>   | Virulence defect     | PMID:17005990               | Hyphal growth abnormal      | PMID:17005990 |
| orf19.5691 | <i>CDC11</i>  | Virulence defect     | PMID:12819094               | Filamentous growth abnormal | PMID:12181342 |

|            |               |                      |                             |                               |               |
|------------|---------------|----------------------|-----------------------------|-------------------------------|---------------|
| orf19.5741 | <i>ALS1</i>   | Virulence defect     | PMID:15042589               | Hyphal growth abnormal        | PMID:15256583 |
| orf19.5798 | <i>LIG4</i>   | Virulence defect     | PMID:16299301               | Filamentous growth abnormal   | PMID:11119499 |
| orf19.589  | <i>VPS21</i>  | Virulence defect     | PMID:19364843               | Filamentous growth abnormal   | PMID:19364843 |
| orf19.5908 | <i>TEC1</i>   | Virulence defect     | PMID:11069668               | Hyphal growth abnormal        | PMID:11069668 |
| orf19.5962 | <i>SNF3</i>   | Virulence defect     | PMID:17030998               | Filamentous growth abnormal   | PMID:17030998 |
| orf19.6009 | <i>SET1</i>   | Virulence defect     | PMID:16629671               | Filamentous growth abnormal   | PMID:16629671 |
| orf19.6033 | <i>CMP1</i>   | Virulence defect     | PMID:16790813               | Hyphal growth abnormal        | PMID:12753189 |
| orf19.6040 | <i>SNF7</i>   | Virulence defect     | PMID:16299290               | Filamentous growth abnormal   | PMID:15590834 |
| orf19.6091 | <i>RIM8</i>   | Virulence defect     | PMID:10992507               | Filamentous growth abnormal   | PMID:10601209 |
| orf19.6092 | <i>KEL1</i>   | Wild-type virulence* | PMID:14500538               | Hyphal growth abnormal*       | PMID:14500538 |
| orf19.610  | <i>EFG1</i>   | Virulence defect     | PMID:15760450               | Hyphal growth abnormal        | PMID:11595734 |
| orf19.6109 | <i>TUP1</i>   | Virulence defect     | PMID:12576958               | Filamentous growth abnormal   | PMID:9204892  |
| orf19.6124 | <i>ACE2</i>   | Virulence defect     | PMID:15255906               | Filamentous growth abnormal   | PMID:15255906 |
| orf19.6214 | <i>ATC1</i>   | Virulence defect     | PMID:17464051               | Hyphal growth abnormal        | PMID:17464051 |
| orf19.6229 | <i>CAT1</i>   | Virulence defect     | PMID:9573075                | Hyphal growth abnormal        | PMID:18352908 |
| orf19.6243 | <i>VPS34</i>  | Virulence defect     | PMID:11065354               | Hyphal growth abnormal        | PMID:11065354 |
| orf19.6362 | <i>SPA2</i>   | Virulence defect     | PMID:12940995               | Hyphal growth abnormal        | PMID:12940995 |
| orf19.6515 | <i>HSP90</i>  | Virulence defect     | PMID:19327993               | Filamentous growth abnormal   | PMID:19327993 |
| orf19.6598 | <i>WAL1</i>   | Virulence defect     | PMID:17139615               | Hyphal growth abnormal        | PMID:15075276 |
| orf19.6640 | <i>TPS1</i>   | Virulence defect     | PMID:9683476                | Hyphal growth abnormal        | PMID:10577485 |
| orf19.6734 | <i>TCC1</i>   | Virulence defect     | PMID:16998076               | Filamentous growth abnormal   | PMID:16998076 |
| orf19.6760 | <i>MDS3</i>   | Virulence defect     | PMID:12524333               | Hyphal growth abnormal        | PMID:16087754 |
| orf19.6798 | <i>SSN6</i>   | Virulence defect     | PMID:12581357               | Hyphal growth abnormal        | PMID:12581357 |
| orf19.6844 | <i>ICL1</i>   | Virulence defect*    | PMID:17158734               | Wild-type filamentous growth* | PMID:11452311 |
| orf19.6953 | <i>IRS4</i>   | Virulence defect     | PMID:16151204               | Hyphal growth abnormal        | PMID:16151204 |
| orf19.7089 | <i>PMR1</i>   | Virulence defect     | PMID:15843378               | Filamentous growth abnormal   | PMID:15843378 |
| orf19.7150 | <i>NRG1</i>   | Virulence defect     | PMID:11532939               | Filamentous growth abnormal   | PMID:11532939 |
| orf19.7247 | <i>RIM101</i> | Virulence defect     | PMID:12524333 PMID:10992507 | Filamentous growth abnormal   | PMID:10074081 |
| orf19.7391 | <i>OCH1</i>   | Virulence defect     | PMID:16263704               | Hyphal growth abnormal        | PMID:16263704 |
| orf19.7479 | <i>NTH1</i>   | Wild-type virulence* | PMID:9421900                | Hyphal growth abnormal*       | PMID:9421900  |
| orf19.7523 | <i>MKC1</i>   | Virulence defect     | PMID:9009353                | Hyphal growth                 | PMID:9493378  |



|            |              |                     |               |                             |               |
|------------|--------------|---------------------|---------------|-----------------------------|---------------|
|            |              |                     |               | <b>abnormal</b>             |               |
| orf19.7549 | <i>PMT5</i>  | Wild-type virulence | PMID:15659169 | Wild-type hyphal growth     | PMID:15659169 |
| orf19.7551 | <i>ALO1</i>  | Virulence defect    | PMID:11349062 | Hyphal growth abnormal      | PMID:11349062 |
| orf19.7622 | <i>SPT3</i>  | Virulence defect    | PMID:12072450 | Filamentous growth abnormal | PMID:12072450 |
| orf19.767  | <i>ERG3</i>  | Virulence defect    | PMID:16436713 | Filamentous growth abnormal | PMID:16436713 |
| orf19.806  | <i>VMA7</i>  | Virulence defect    | PMID:15870472 | Hyphal growth abnormal      | PMID:15870472 |
| orf19.881  | <i>DFG16</i> | Virulence defect    | PMID:17367383 | Filamentous growth abnormal | PMID:17367383 |
| orf19.895  | <i>HOG1</i>  | Virulence defect    | PMID:10322006 | Filamentous growth abnormal | PMID:16339080 |
| orf19.896  | <i>CHK1</i>  | Virulence defect    | PMID:10572127 | Hyphal growth abnormal      | PMID:10572127 |
| orf19.96   | <i>TOP1</i>  | Virulence defect    | PMID:9043115  | Hyphal growth abnormal      | PMID:9043115  |
| orf19.971  | <i>SKN7</i>  | Virulence defect    | PMID:15039366 | Hyphal growth abnormal      | PMID:15039366 |
| orf19.974  | <i>ROT2</i>  | Virulence defect    | PMID:17933909 | Filamentous growth abnormal | PMID:17933909 |

\* Denotes discordance between virulence and morphology phenotypes

**Table S2 *C. albicans* mutants with previously reported virulence and kidney burden phenotypes**

| <b>Systematic name</b> | <b>Gene name</b> | <b>Virulence</b> | <b>Kidney burden</b> | <b>Reference</b> |
|------------------------|------------------|------------------|----------------------|------------------|
| orf19.5741             | <i>ALS1</i>      | Decreased        | Decreased            | PMID:15042589    |
| orf19.2849             | <i>AQY1</i>      | Wild-type        | Wild-type            | PMID:11746601    |
| orf19.4565             | <i>BGL2</i>      | Decreased        | Decreased            | PMID:9043114     |
| orf19.4670             | <i>CAS5</i>      | Decreased        | Decreased            | PMID:19463063    |
| orf19.4328             | <i>CCC2</i>      | Wild-type        | Wild-type            | PMID:12067343    |
| orf19.548              | <i>CDC10</i>     | Decreased        | Decreased            | PMID:12819094    |
| orf19.5691             | <i>CDC11</i>     | Decreased        | Decreased            | PMID:12819094    |
| orf19.4890             | <i>CLA4</i>      | Decreased        | Decreased            | PMID:9259554     |
| orf19.6033             | <i>CMP1</i>      | Decreased        | Decreased            | PMID:12753189    |
| orf19.4009             | <i>CNB1</i>      | Decreased        | Decreased            | PMID:12796287    |
| orf19.367              | <i>CNH1</i>      | Decreased*       | Wild-type*           | PMID:10832630    |
| orf19.4866             | <i>CPP1</i>      | Decreased        | Decreased            | PMID:9398674     |
| orf19.4242             | <i>CST20</i>     | Decreased        | Decreased            | PMID:8917571     |
| orf19.5083             | <i>DRG1</i>      | Decreased        | Decreased            | PMID:17159222    |
| orf19.4958             | <i>ECM25</i>     | Decreased        | Decreased            | PMID:18368314    |
| orf19.7219             | <i>FTR1</i>      | Decreased        | Decreased            | PMID:10807578    |
| orf19.7231             | <i>FTR2</i>      | Wild-type        | Wild-type            | PMID:10807578    |
| orf19.4308             | <i>HSL1</i>      | Decreased        | Decreased            | PMID:15659158    |
| orf19.4257             | <i>INT1</i>      | Decreased*       | Increased*           | PMID:10444345    |
| orf19.4755             | <i>KEX2</i>      | Decreased        | Decreased            | PMID:12419804    |
| orf19.1040             | <i>MAD2</i>      | Decreased        | Decreased            | PMID:12100546    |
| orf19.7523             | <i>MKC1</i>      | Decreased        | Decreased            | PMID:9009353     |
| orf19.2881             | <i>MNN4</i>      | Wild-type        | Wild-type            | PMID:15271989    |
| orf19.1665             | <i>MNT1</i>      | Decreased        | Decreased            | PMID:9636208     |
| orf19.7391             | <i>OCH1</i>      | Decreased*       | Wild-type*           | PMID:16263704    |
| orf19.689              | <i>PLB1</i>      | Decreased        | Decreased            | PMID:9748287     |
| orf19.1161             | <i>PLD1</i>      | Decreased        | Decreased            | PMID:15552646    |
| orf19.5171             | <i>PMT1</i>      | Decreased        | Decreased            | PMID:9694829     |
| orf19.4208             | <i>RAD52</i>     | Decreased        | Decreased            | PMID:16299301    |
| orf19.7247             | <i>RIM101</i>    | Decreased        | Decreased            | PMID:10992507    |
| orf19.6091             | <i>RIM8</i>      | Decreased        | Decreased            | PMID:10992507    |
| orf19.2614             | <i>RSR1</i>      | Decreased        | Decreased            | PMID:18281602    |
| orf19.6009             | <i>SET1</i>      | Decreased        | Decreased            | PMID:16629671    |
| orf19.5962             | <i>SNF3</i>      | Decreased*       | Wild-type*           | PMID:17030998    |
| orf19.2060             | <i>SOD5</i>      | Decreased        | Decreased            | PMID:14617819    |
| orf19.1671             | <i>UTR2</i>      | Decreased        | Decreased            | PMID:15042589    |
| orf19.6243             | <i>VPS34</i>     | Decreased        | Decreased            | PMID:11065354    |
| orf19.4339             | <i>VPS4</i>      | Decreased        | Decreased            | PMID:18814053    |

\* Denotes discrepancy between virulence and kidney burden

**Table S6 Analysis of hyphal formation among infectivity-defective mutants**

| Mutant | Systematic name | Gene name    | M score | Hyphal formation |
|--------|-----------------|--------------|---------|------------------|
| 57     | orf19.2500      |              | S       | Normal           |
| 58     | orf19.2570      | <i>MCI4</i>  | S       | Normal           |
| 62     | orf19.2821      |              | S       | Normal           |
| 70     | orf19.3290      |              | 0       | Normal           |
| 71     | orf19.3335      |              | 0       | Normal           |
| 75     | orf19.3611      |              | 0       | Normal           |
| 93     | orf19.4758      |              | S       | Normal           |
| 101    | orf19.4831      |              | 0       | Normal           |
| 103    | orf19.4933      | <i>FAD3</i>  | 2       | Normal           |
| 111    | orf19.5234      | <i>RBD1</i>  | 2       | Normal           |
| 118    | orf19.5499      |              | 0       | Normal           |
| 119    | orf19.5509      |              | 0       | Normal           |
| 129    | orf19.6035      |              | S       | Normal           |
| 133    | orf19.6249      | <i>HAK1</i>  | 0       | Normal           |
| 134    | orf19.6327      | <i>HET1</i>  | 0       | Normal           |
| 136    | orf19.6607      |              | S       | Normal           |
| 144    | orf19.7288      |              | 0       | Normal           |
| 147    | orf19.7436      | <i>AAF1</i>  | 2       | Normal           |
| 150    | orf19.7590      |              | S       | Normal           |
| 193    | orf19.30        |              | 5       | Normal           |
| 200    | orf19.101       | <i>RIM9</i>  | 2       | Defective        |
| 209    | orf19.191       | <i>KIC1</i>  | 6       | Defective        |
| 211    | orf19.194       |              | 0       | Normal           |
| 225    | orf19.290       | <i>KRE5</i>  | 4       | Defective        |
| 229    | orf19.328       | <i>NPR2</i>  | 4       | Normal           |
| 241    | orf19.449       |              | 0       | Normal           |
| 247    | orf19.529       |              | 0       | Normal           |
| 249    | orf19.548       | <i>CDC10</i> | 1       | Normal           |
| 251    | orf19.557       |              | 0       | Normal           |
| 263    | orf19.649       |              | 3       | Defective        |
| 265    | orf19.663       | <i>GIN4</i>  | 6       | Defective        |
| 275    | orf19.723       | <i>BCR1</i>  | 5       | Defective        |
| 276    | orf19.726       | <i>PPZ1</i>  | 4       | Normal           |
| 281    | orf19.753       |              | 0       | Normal           |
| 287    | orf19.783       |              | 5       | Defective        |
| 293    | orf19.807       | <i>CHS5</i>  | 2       | Normal           |
| 299    | orf19.844       | <i>STE11</i> | 3       | Normal           |
| 307    | orf19.895       | <i>HOG1</i>  | 4       | Normal           |
| 319    | orf19.1040      | <i>MAD2</i>  | 0       | Normal           |
| 324    | orf19.1092      |              | 3       | Defective        |
| 340    | orf19.1264      | <i>CFL2</i>  | 0       | Normal           |
| 344    | orf19.1276      |              | 0       | Normal           |
| 360    | orf19.1373      | <i>INP51</i> | 3       | Normal           |
| 362    | orf19.1392      |              | 0       | Normal           |
| 367    | orf19.1445      | <i>ESC4</i>  | 0       | Normal           |
| 372    | orf19.1490      | <i>MSB2</i>  | 4       | Normal           |
| 379    | orf19.1567      |              | 4       | Normal           |
| 388    | orf19.1621      | <i>GPA2</i>  | 4       | Normal           |
| 397    | orf19.1671      | <i>UTR2</i>  | 2       | Normal           |
| 440    | orf19.2013      | <i>KAR2</i>  | 0       | Normal           |
| 442    | orf19.2021      | <i>HGT8</i>  | 0       | Normal           |
| 459    | orf19.2094      | <i>PDR6</i>  | 1       | Normal           |
| 486    | orf19.2315      |              | 0       | Normal           |
| 497    | orf19.2444      | <i>CHS7</i>  | 0       | Normal           |

|      |             |              |    |           |
|------|-------------|--------------|----|-----------|
| 504  | orf19.2484  |              | IC | Normal    |
| 517  | orf19.2653  |              | 0  | Normal    |
| 526  | orf19.2726  |              | 0  | Normal    |
| 540  | orf19.2842  | <i>GZF3</i>  | 2  | Normal    |
| 552  | orf19.2961  |              | 0  | Normal    |
| 582  | orf19.3201  | <i>MTLA1</i> | 0  | Normal    |
| 585  | orf19.3212  | <i>MID1</i>  | 0  | Normal    |
| 590  | orf19.3283  |              | 0  | Normal    |
| 599  | orf19.3384  |              | 0  | Normal    |
| 624  | orf19.3575  | <i>CDC19</i> | 0  | Normal    |
| 650  | orf19.3753  | <i>SEF1</i>  | 0  | Normal    |
| 655  | orf19.3794  | <i>CSR1</i>  | 3  | Normal    |
| 660  | orf19.3829  | <i>PHR1</i>  | 4  | Defective |
| 670  | orf19.3895  | <i>CHT2</i>  | 0  | Normal    |
| 678  | orf19.3995  | <i>RIM13</i> | 3  | Defective |
| 680  | orf19.4002  | <i>DUN1</i>  | 0  | Normal    |
| 692  | orf19.4084  | <i>KIS1</i>  | 3  | Normal    |
| 706  | orf19.4182  |              | 4  | Defective |
| 709  | orf19.4188  | <i>NMD5</i>  | 0  | Normal    |
| 726  | orf19.4292  |              | 4  | Normal    |
| 728  | orf19.4308  | <i>HSL1</i>  | 2  | Normal    |
| 750  | orf19.4471  |              | 3  | Normal    |
| 769  | orf19.4593  | <i>RGA2</i>  | 0  | Normal    |
| 770  | orf19.4603  | <i>ARL1</i>  | 4  | Normal    |
| 774  | orf19.4640  | <i>PWP1</i>  | S  | Defective |
| 783  | orf19.4720  | <i>CTR2</i>  | 3  | Normal    |
| 786  | orf19.4729  |              | 4  | Normal    |
| 791  | orf19.4755  | <i>KEX2</i>  | S  | Defective |
| 796  | orf19.4785  | <i>PTC1</i>  | 3  | Normal    |
| 805  | orf19.4844  |              | 3  | Normal    |
| 809  | orf19.4866  | <i>CPP1</i>  | 2  | Normal    |
| 812  | orf19.4890  | <i>CLA4</i>  | 4  | Normal    |
| 814  | orf19.4905  |              | 0  | Normal    |
| 831  | orf19.5068  |              | 4  | Defective |
| 855  | orf19.5241  | <i>SNT1</i>  | 2  | Normal    |
| 881  | orf19.5445  | <i>GLO3</i>  | 4  | Normal    |
| 904  | orf19.5662  | <i>PEP7</i>  | 5  | Normal    |
| 918  | orf19.5776  | <i>TOM1</i>  | 2  | Normal    |
| 919  | orf19.5782  |              | 0  | Normal    |
| 942  | orf19.5994  | <i>RHB1</i>  | 0  | Normal    |
| 944  | orf19.6011  | <i>SIN3</i>  | 6  | Normal    |
| 956  | orf19.6124  | <i>ACE2</i>  | 5  | Normal    |
| 960  | orf19.6202  | <i>RBT4</i>  | 0  | Normal    |
| 969  | orf19.6293  |              | 3  | Normal    |
| 980  | orf19.6411  |              | 0  | Normal    |
| 1018 | orf19.6736  |              | S  | Normal    |
| 1023 | orf19.6784  | <i>PGA32</i> | 0  | Normal    |
| 1031 | orf19.6842  |              | 2  | Normal    |
| 1050 | orf19.7049  | <i>CYB5</i>  | 0  | Normal    |
| 1055 | orf19.7094  | <i>HGT12</i> | 0  | Normal    |
| 1063 | orf19.7150  | <i>NRG1</i>  | 4  | Normal    |
| 1064 | orf19.7186  | <i>CLB4</i>  | 3  | Normal    |
| 1090 | orf19.7349  | <i>CHS4</i>  | 0  | Normal    |
| 1092 | orf19.7359  | <i>CRZ1</i>  | 0  | Normal    |
| 1098 | orf19.7388  | <i>PBS2</i>  | 3  | Normal    |
| 1100 | orf19.7397  |              | 0  | Normal    |
| 1132 | orf19.10080 | <i>TRP2</i>  | 0  | Normal    |
| 1133 | orf19.10341 | <i>RFG1</i>  | 3  | Normal    |
| 1138 | orf19.11256 | <i>PPG1</i>  | 4  | Normal    |

|             |                    |             |          |                  |
|-------------|--------------------|-------------|----------|------------------|
| <b>1139</b> | <b>orf19.11257</b> | <b>SSK2</b> | <b>3</b> | <b>Normal</b>    |
| <b>1149</b> | <b>orf19.13191</b> | <b>SNF4</b> | <b>S</b> | <b>Defective</b> |

**Legend for Table S6** The ability of the 115 infectivity-defective mutants to form hyphae was determined using the clinical germ tube assay. Small colonies of each mutant and of the wild type comparator SN250 were inoculated into 500  $\mu$ l bovine serum, mixed by vortexing, and incubated at 35°C for 2.5 hours. Cells were fixed by addition of 1 drop of 10% formaldehyde and examined under 40x magnification. Scoring for germ tube formation was as follows: “normal” was defined as the presence of at least 5 true hyphae (short lateral extensions from the yeast cell with parallel sides and no constriction at the junction with the parent; typically, 5-10 hyphae were seen within 10 microscopic fields); “defective” was defined as 0-4 hyphae with wild type morphology on the entire slide (>10 microscopic fields).

**Table S7 Analysis of chromosome ploidy in 12 mutants and the parent strain by quantitative PCR**

| Chromosome | Strain                    | Experiment 1 |         | Experiment 2 |         | Average Ploidy | Chromosome | Strain | Experiment 1 |         | Experiment 2 |         | Average Ploidy |
|------------|---------------------------|--------------|---------|--------------|---------|----------------|------------|--------|--------------|---------|--------------|---------|----------------|
|            |                           | Ploidy       | Std dev | Ploidy       | Std dev |                |            |        | Ploidy       | Std dev | Ploidy       | Std dev |                |
| Ch1        | SN152                     | 1.11         | 0.13    | 1.14         | 0.26    | 1.12           | Ch1        | SN152  | 1.10         | 0.05    | 1.12         | 0.07    | 1.11           |
|            | 4 ( <i>slid1</i> )        | 1.00         | 0.03    | 1.00         | 0.04    | 1.00           |            | 650    | 1.00         | 0.04    | 0.85         | 0.11    | 0.93           |
|            | 90 ( <i>hsx11</i> )       | 0.98         | 0.06    | 1.00         | 0.06    | 0.99           |            | 960    | 0.96         | 0.05    | 0.99         | 0.09    | 0.97           |
|            | 101 ( <i>orf19.4831</i> ) | 0.98         | 0.07    | 0.91         | 0.09    | 0.94           |            | 72     | 0.99         | 0.02    | 1.00         | 0.06    | 0.99           |
|            | m134 ( <i>het1</i> )      | 1.14         | 0.05    | 1.12         | 0.10    | 1.13           |            | 122    | 0.97         | 0.03    | 0.99         | 0.04    | 0.98           |
|            | 40                        | 0.96         | 0.02    | 0.91         | 0.07    | 0.93           |            | 143    | 1.00         | 0.06    | 1.00         | 0.03    | 1.00           |
|            | 47                        | 1.02         | 0.06    | 1.05         | 0.05    | 1.04           |            | 1070   | 1.13         | 0.05    | 1.20         | 0.05    | 1.17           |
| Ch2        | SN152                     | 1.16         | 0.05    | 1.19         | 0.10    | 1.18           | Ch2        | SN152  | 1.15         | 0.05    | 1.14         | 0.10    | 1.15           |
|            | 4 ( <i>slid1</i> )        | 0.95         | 0.06    | 1.00         | 0.06    | 0.98           |            | 650    | 0.95         | 0.04    | 0.97         | 0.11    | 0.96           |
|            | 90 ( <i>hsx11</i> )       | 1.00         | 0.05    | 1.00         | 0.03    | 1.00           |            | 960    | 0.98         | 0.06    | 0.94         | 0.04    | 0.96           |
|            | 101 ( <i>orf19.4831</i> ) | 0.94         | 0.03    | 0.97         | 0.03    | 0.96           |            | 72     | 1.00         | 0.05    | 1.00         | 0.07    | 1.00           |
|            | m134 ( <i>het1</i> )      | 1.09         | 0.08    | 1.17         | 0.01    | 1.13           |            | 122    | 0.98         | 0.04    | 1.00         | 0.04    | 0.99           |
|            | 40                        | 0.98         | 0.05    | 1.00         | 0.05    | 0.99           |            | 143    | 1.04         | 0.04    | 1.03         | 0.03    | 1.04           |
|            | 47                        | 1.01         | 0.04    | 1.07         | 0.14    | 1.04           |            | 1070   | 1.00         | 0.02    | 1.09         | 0.12    | 1.04           |
| Ch3        | SN152                     | 1.04         | 0.03    | 1.14         | 0.04    | 1.13           | Ch3        | SN152  | 1.12         | 0.03    | 1.19         | 0.04    | 1.16           |
|            | 4 ( <i>slid1</i> )        | 0.91         | 0.02    | 0.99         | 0.02    | 0.99           |            | 650    | 1.03         | 0.02    | 0.95         | 0.08    | 0.99           |
|            | 90 ( <i>hsx11</i> )       | 0.90         | 0.05    | 1.00         | 0.05    | 0.99           |            | 960    | 1.00         | 0.03    | 0.94         | 0.10    | 0.97           |
|            | 101 ( <i>orf19.4831</i> ) | 0.97         | 0.05    | 0.89         | 0.04    | 0.97           |            | 72     | 0.98         | 0.02    | 0.96         | 0.07    | 0.97           |
|            | m134 ( <i>het1</i> )      | 1.01         | 0.05    | 1.06         | 0.04    | 1.07           |            | 122    | 0.98         | 0.04    | 1.00         | 0.02    | 0.99           |
|            | 40                        | 1.00         | 0.08    | 0.92         | 0.05    | 1.00           |            | 143    | 1.00         | 0.05    | 1.04         | 0.04    | 1.02           |
|            | 47                        | 1.14         | 0.10    | 1.01         | 0.03    | 1.12           |            | 1070   | 1.10         | 0.08    | 1.40         | 0.19    | 1.25           |
| Ch4        | SN152                     | 0.93         | 0.29    | 0.92         | 0.24    | 0.91           | Ch4        | SN152  | 0.91         | 0.30    | 1.00         | 0.25    | 0.95           |
|            | 4 ( <i>slid1</i> )        | 1.06         | 0.15    | 0.99         | 0.11    | 1.01           |            | 650    | 1.00         | 0.12    | 1.00         | 0.20    | 1.00           |
|            | 90 ( <i>hsx11</i> )       | 1.00         | 0.44    | 1.03         | 0.17    | 1.00           |            | 960    | 1.03         | 0.04    | 1.00         | 0.20    | 1.01           |
|            | 101 ( <i>orf19.4831</i> ) | 1.06         | 0.15    | 1.05         | 0.14    | 1.04           |            | 72     | 1.02         | 0.03    | 1.09         | 0.27    | 1.06           |
|            | m134 ( <i>het1</i> )      | 1.00         | 0.12    | 0.97         | 0.19    | 0.97           |            | 122    | 0.97         | 0.03    | 1.06         | 0.09    | 1.01           |
|            | 40                        | 0.98         | 0.16    | 1.00         | 0.16    | 0.98           |            | 143    | 0.84         | 0.07    | 1.00         | 0.12    | 0.92           |
|            | 47                        | 1.01         | 0.16    | 1.05         | 0.19    | 1.02           |            | 1070   | 1.10         | 0.03    | 1.13         | 0.12    | 1.11           |
| Ch5        | SN152                     | 0.91         | 0.14    | 0.85         | 0.34    | 0.90           | Ch5        | SN152  | 1.01         | 0.15    | 1.00         | 0.15    | 1.00           |
|            | 4 ( <i>slid1</i> )        | 1.00         | 0.10    | 1.00         | 0.11    | 1.02           |            | 650    | 0.85         | 0.16    | 1.00         | 0.15    | 0.92           |
|            | 90 ( <i>hsx11</i> )       | 1.02         | 0.12    | 0.94         | 0.17    | 1.00           |            | 960    | 1.03         | 0.12    | 1.04         | 0.14    | 1.04           |
|            | 101 ( <i>orf19.4831</i> ) | 0.94         | 0.09    | 1.01         | 0.11    | 0.99           |            | 72     | 0.94         | 0.06    | 0.94         | 0.10    | 0.94           |
|            | m134 ( <i>het1</i> )      | 1.02         | 0.14    | 1.16         | 0.04    | 1.11           |            | 122    | 1.00         | 0.08    | 1.03         | 0.09    | 1.01           |
|            | 40                        | 1.00         | 0.18    | 1.02         | 0.11    | 1.03           |            | 143    | 1.13         | 0.10    | 1.24         | 0.10    | 1.19           |
|            | 47                        | 0.97         | 0.17    | 0.98         | 0.08    | 0.99           |            | 1070   | 0.98         | 0.15    | 0.97         | 0.09    | 0.98           |
| Ch6        | SN152                     | 1.07         | 0.04    | 1.06         | 0.02    | 1.06           | Ch6        | SN152  | 1.04         | 0.04    | 1.12         | 0.02    | 1.08           |
|            | 4 ( <i>slid1</i> )        | 0.97         | 0.05    | 1.01         | 0.03    | 0.99           |            | 650    | 1.02         | 0.01    | 1.00         | 0.04    | 1.01           |
|            | 90 ( <i>hsx11</i> )       | 0.98         | 0.02    | 1.02         | 0.02    | 1.00           |            | 960    | 0.98         | 0.03    | 0.99         | 0.07    | 0.99           |
|            | 101 ( <i>orf19.4831</i> ) | 1.01         | 0.02    | 0.99         | 0.02    | 1.00           |            | 72     | 0.96         | 0.00    | 0.96         | 0.06    | 0.96           |
|            | m134 ( <i>het1</i> )      | 1.00         | 0.02    | 1.00         | 0.04    | 1.00           |            | 122    | 1.00         | 0.08    | 1.00         | 0.04    | 1.00           |
|            | 40                        | 1.01         | 0.08    | 1.00         | 0.04    | 1.01           |            | 143    | 1.04         | 0.02    | 1.09         | 0.02    | 1.06           |
|            | 47                        | 0.99         | 0.07    | 0.94         | 0.02    | 0.97           |            | 1070   | 0.97         | 0.06    | 1.00         | 0.17    | 0.98           |
| Ch7        | SN152                     | 0.98         | 0.04    | 1.00         | 0.22    | 0.99           | Ch7        | SN152  | 1.06         | 0.08    | 1.03         | 0.10    | 1.04           |
|            | 4 ( <i>slid1</i> )        | 0.96         | 0.12    | 1.03         | 0.03    | 1.00           |            | 650    | 1.06         | 0.05    | 0.98         | 0.13    | 1.02           |
|            | 90 ( <i>hsx11</i> )       | 1.02         | 0.05    | 1.04         | 0.06    | 1.04           |            | 960    | 1.06         | 0.08    | 1.05         | 0.18    | 1.06           |
|            | 101                       | 1.05         | 0.03    | 0.99         | 0.10    | 1.02           |            | 72     | 0.93         | 0.05    | 1.04         | 0.06    | 0.99           |

|     |                              |      |      |      |      |      |     |       |      |      |      |      |      |
|-----|------------------------------|------|------|------|------|------|-----|-------|------|------|------|------|------|
|     | ( <i>orf19.4831</i> )        |      |      |      |      |      |     |       |      |      |      |      |      |
|     | m134 ( <i>het1</i> )         | 0.98 | 0.16 | 0.97 | 0.07 | 0.98 |     | 122   | 1.00 | 0.09 | 0.97 | 0.03 | 0.99 |
|     | 40                           | 1.05 | 0.09 | 1.02 | 0.05 | 1.04 |     | 143   | 0.98 | 0.02 | 1.00 | 0.04 | 0.99 |
|     | 47                           | 1.00 | 0.07 | 0.94 | 0.11 | 0.97 |     | 1070  | 1.00 | 0.08 | 0.97 | 0.14 | 0.98 |
| ChR | SN152                        | 0.93 | 0.10 | 0.76 | 0.12 | 0.85 | ChR | SN152 | 1.03 | 0.10 | 0.98 | 0.06 | 1.00 |
|     | 4 ( <i>sld1</i> )            | 1.05 | 0.06 | 1.06 | 0.10 | 1.05 |     | 650   | 1.12 | 0.10 | 0.99 | 0.11 | 1.05 |
|     | 90 ( <i>hsx11</i> )          | 1.00 | 0.07 | 1.00 | 0.11 | 1.00 |     | 960   | 1.06 | 0.06 | 1.04 | 0.08 | 1.05 |
|     | 101<br>( <i>orf19.4831</i> ) | 1.00 | 0.05 | 1.09 | 0.08 | 1.05 |     | 72    | 1.00 | 0.06 | 1.08 | 0.04 | 1.04 |
|     | m134 ( <i>het1</i> )         | 0.83 | 0.03 | 0.89 | 0.06 | 0.86 |     | 122   | 0.93 | 0.08 | 1.00 | 0.05 | 0.96 |
|     | 40                           | 1.01 | 0.04 | 1.06 | 0.08 | 1.04 |     | 143   | 0.74 | 0.02 | 0.87 | 0.03 | 0.80 |
|     | 47                           | 0.82 | 0.06 | 0.94 | 0.10 | 0.88 |     | 1070  | 0.84 | 0.03 | 1.01 | 0.05 | 0.93 |

**Legend for Table S7** Analysis of the eight *C. albicans* chromosomes was performed on the parental strain (SN152), six strains that demonstrated abnormal infectivity (mutants 4 (*sld1/orf19.260*), 90 (*hsx11*), 101 (*orf19.4831*), 134 (*het1*), 650, and 960), and 6 strains with normal infectivity (mutants 40, 47, 72, 122, 143, and 1070). Results of two experiments are presented.

The aneuploidy assay was adapted from that of Arbour et al.<sup>3</sup> using published Primer Set A to monitor the copy number of *C. albicans* Chromosomes 1, 2, 3, 4, 5, 6, 7, and R. Modifications were as follows: Rather than performing mixed reactions with TaqMan probes to all eight chromosomes, SYBR green was used to monitor the appearance of PCR products in individual reactions for each chromosome. 20  $\mu$ l reactions were assembled containing ~200 ng of genomic DNA of the strain being tested, 2  $\mu$ M of each diagnostic primer, 2 mM MgCl<sub>2</sub>, 50 mM KCl, 10 mM Tris 8.3, 0.075x SYBR Green (Sigma), and 0.2 units of Taq polymerase. In a 384 well plate, SN152 (diploid control) and 6 mutant strains were tested in sextuplicate, along with sextuplicate reactions of SN152 used for calibration with a standard curve. Each experiment was repeated, such that 12 replicates of each sample were represented in the final analysis. Data for each primer set were median-centered and the wild-type sample was analyzed identically to each mutant sample.

**Table S9 *C. albicans* strains used in this study**

| Strain       | Phenotype                                                              | Genotype                                                                                                                                                                                                                                                                            | Reference                |
|--------------|------------------------------------------------------------------------|-------------------------------------------------------------------------------------------------------------------------------------------------------------------------------------------------------------------------------------------------------------------------------------|--------------------------|
| <b>SN152</b> | Reference strain<br>His <sup>-</sup> Leu <sup>-</sup> Arg <sup>-</sup> | <i>his1Δ/his1Δ, leu2Δ/leu2Δ, arg4Δ/arg4Δ, URA3/ura3Δ::imm<sup>434</sup>, IRO1/iro1Δ::imm<sup>434</sup></i>                                                                                                                                                                          | Noble and Johnson (2005) |
| <b>SN87</b>  | Reference strain<br>His <sup>-</sup> Leu <sup>-</sup>                  | <i>his1Δ/his1Δ, leu2Δ/leu2Δ, URA3/ura3Δ::imm<sup>434</sup>, IRO1/iro1Δ::imm<sup>434</sup></i>                                                                                                                                                                                       | Noble and Johnson (2005) |
| <b>QMY23</b> | Reference strain<br>prototroph                                         | <i>his1Δ/his1Δ, leu2Δ::C.dubliniensis HIS1/leu2Δ::C.maltosa LEU2, URA3/ura3Δ::imm<sup>434</sup>, IRO1/iro1Δ::imm<sup>434</sup></i><br>Note: QMY23 was derived from SN87 by integration of <i>C. dubliniensis HIS1</i> and <i>C. maltosa LEU2</i> at the disrupted <i>leu2</i> loci. | Mitrovich et al. (2007)  |
| <b>SN250</b> | Reference strain<br>Arg <sup>-</sup>                                   | <i>his1Δ/his1Δ, leu2Δ::C.dubliniensis HIS1/leu2Δ::C.maltosa LEU2, arg4Δ/arg4Δ, URA3/ura3Δ::imm<sup>434</sup>, IRO1/iro1Δ::imm<sup>434</sup></i>                                                                                                                                     | This work                |
| <b>SN255</b> | <i>orf19.260</i> mutant<br>Arg <sup>-</sup>                            | <i>his1Δ/his1Δ, leu2Δ/leu2Δ, arg4Δ/arg4Δ, URA3/ura3Δ::imm<sup>434</sup>, IRO1/iro1Δ::imm<sup>434</sup>, orf19.260Δ::C.dubliniensisHIS1/orf19.260Δ::C.maltosaLEU2</i> (Isolate 1)                                                                                                    | This work                |
| <b>SN256</b> | <i>orf19.260</i> mutant<br>Arg <sup>-</sup>                            | <i>his1Δ/his1Δ, leu2Δ/leu2Δ, arg4Δ/arg4Δ, URA3/ura3Δ::imm<sup>434</sup>, IRO1/iro1Δ::imm<sup>434</sup>, orf19.260Δ::C.dubliniensisHIS1/orf19.260Δ::C.maltosaLEU2</i> (Isolate 2)                                                                                                    | This work                |
| <b>SN257</b> | <i>orf19.260</i> mutant<br>Arg <sup>-</sup>                            | <i>his1Δ/his1Δ, leu2Δ/leu2Δ, arg4Δ/arg4Δ, URA3/ura3Δ::imm<sup>434</sup>, IRO1/iro1Δ::imm<sup>434</sup>, orf19.260Δ::C.dubliniensisHIS1/orf19.260Δ::C.maltosaLEU2</i> (Isolate 3)                                                                                                    | This work                |
| <b>SN285</b> | <i>orf19.4592 (HSX11)</i> mutant<br>Arg <sup>-</sup>                   | <i>his1Δ/his1Δ, leu2Δ/leu2Δ, arg4Δ/arg4Δ, URA3/ura3Δ::imm<sup>434</sup>, IRO1/iro1Δ::imm<sup>434</sup>, orf19.4592Δ::C.dubliniensisHIS1/orf19.4592Δ::C.maltosaLEU2</i> (Isolate 1)                                                                                                  | This work                |
| <b>SN286</b> | <i>orf19.4592 (HSX11)</i> mutant<br>Arg <sup>-</sup>                   | <i>his1Δ/his1Δ, leu2Δ/leu2Δ, arg4Δ/arg4Δ, URA3/ura3Δ::imm<sup>434</sup>, IRO1/iro1Δ::imm<sup>434</sup>, orf19.4592Δ::C.dubliniensisHIS1/orf19.4592Δ::C.maltosaLEU2</i> (Isolate 2)                                                                                                  | This work                |
| <b>SN290</b> | <i>orf19.4831</i> mutant<br>Arg <sup>-</sup>                           | <i>his1Δ/his1Δ, leu2Δ/leu2Δ, arg4Δ/arg4Δ, URA3/ura3Δ::imm<sup>434</sup>, IRO1/iro1Δ::imm<sup>434</sup>, orf19.4831Δ::C.dubliniensisHIS1/orf19.4831Δ::C.maltosaLEU2</i> (Isolate 1)                                                                                                  | This work                |
| <b>SN291</b> | <i>orf19.4831</i> mutant<br>Arg <sup>-</sup>                           | <i>his1Δ/his1Δ, leu2Δ/leu2Δ, arg4Δ/arg4Δ, URA3/ura3Δ::imm<sup>434</sup>, IRO1/iro1Δ::imm<sup>434</sup>, orf19.4831Δ::C.dubliniensisHIS1/orf19.4831Δ::C.maltosaLEU2</i> (Isolate 2)                                                                                                  | This work                |
| <b>SN292</b> | <i>orf19.4831</i> mutant<br>Arg <sup>-</sup>                           | <i>his1Δ/his1Δ, leu2Δ/leu2Δ, arg4Δ/arg4Δ, URA3/ura3Δ::imm<sup>434</sup>, IRO1/iro1Δ::imm<sup>434</sup>, orf19.4831Δ::C.dubliniensisHIS1/orf19.4831Δ::C.maltosaLEU2</i> (Isolate 3)                                                                                                  | This work                |



|              |                                                               |                                                                                                                                                                                                          |           |
|--------------|---------------------------------------------------------------|----------------------------------------------------------------------------------------------------------------------------------------------------------------------------------------------------------|-----------|
| <b>SN296</b> | <i>orf19.6327 (HET1)</i> mutant<br>Arg <sup>-</sup>           | <i>his1Δ/his1Δ, leu2Δ/leu2Δ, arg4Δ/arg4Δ, URA3/ura3Δ::imm<sup>434</sup>, IRO1/iro1Δ::imm<sup>434</sup>, orf19.6327Δ::C.dublinsiensisHIS1/orf19.6327Δ::C.maltosaLEU2</i><br>(Isolate 1)                   | This work |
| <b>SN297</b> | <i>orf19.6327 (HET1)</i> mutant<br>Arg <sup>-</sup>           | <i>his1Δ/his1Δ, leu2Δ/leu2Δ, arg4Δ/arg4Δ, URA3/ura3Δ::imm<sup>434</sup>, IRO1/iro1Δ::imm<sup>434</sup>, orf19.6327Δ::C.dublinsiensisHIS1/orf19.6327Δ::C.maltosaLEU2</i><br>(Isolate 2)                   | This work |
| <b>SN298</b> | <i>orf19.6327 (HET1)</i> mutant<br>Arg <sup>-</sup>           | <i>his1Δ/his1Δ, leu2Δ/leu2Δ, arg4Δ/arg4Δ, URA3/ura3Δ::imm<sup>434</sup>, IRO1/iro1Δ::imm<sup>434</sup>, orf19.6327Δ::C.dublinsiensisHIS1/orf19.6327Δ::C.maltosaLEU2</i><br>(Isolate 3)                   | This work |
| <b>SN425</b> | Reference strain<br>prototroph                                | <i>his1Δ/his1Δ, leu2Δ::C.dublinsiensisHIS1/leu2Δ::C.maltosaLEU2, arg4Δ/arg4Δ::C.dublinsiensisARG4, URA3/ura3Δ::imm<sup>434</sup>, IRO1/iro1Δ::imm<sup>434</sup></i>                                      | This work |
| <b>SN426</b> | <i>orf9.4592 (HSX11)</i><br>Complemented strain<br>prototroph | <i>his1Δ/his1Δ, leu2Δ/leu2Δ::ORF19.4592-C.dublinsiensisARG4, arg4Δ/arg4Δ4, URA3/ura3Δ::imm<sup>434</sup>, IRO1/iro1Δ::imm<sup>434</sup>, orf19.4592Δ::C.dublinsiensisHIS1/orf19.4592Δ::C.maltosaLEU2</i> | This work |
| <b>SN428</b> | <i>orf19.260</i><br>Complemented strain<br>prototroph         | <i>his1Δ/his1Δ, leu2Δ/leu2Δ::ORF19.260-C.dublinsiensisARG4, arg4Δ/arg4Δ4, URA3/ura3Δ::imm<sup>434</sup>, IRO1/iro1Δ::imm<sup>434</sup>, orf19.260Δ::C.dublinsiensisHIS1/orf19.260Δ::C.maltosaLEU2</i>    | This work |
| <b>SN430</b> | <i>orf19.4831</i><br>Complemented strain<br>prototroph        | <i>his1Δ/his1Δ, leu2Δ/leu2Δ::ORF19.4831-C.dublinsiensisARG4, arg4Δ/arg4Δ4, URA3/ura3Δ::imm<sup>434</sup>, IRO1/iro1Δ::imm<sup>434</sup>, orf19.4831Δ::C.dublinsiensisHIS1/orf19.4831Δ::C.maltosaLEU2</i> | This work |
| <b>SN432</b> | <i>orf9.6327 (HET1)</i><br>Complemented strain<br>prototroph  | <i>his1Δ/his1Δ, leu2Δ/leu2Δ::ORF19.6327-C.dublinsiensisARG4, arg4Δ/arg4Δ4, URA3/ura3Δ::imm<sup>434</sup>, IRO1/iro1Δ::imm<sup>434</sup>, orf19.6327Δ::C.dublinsiensisHIS1/orf19.6327Δ::C.maltosaLEU2</i> | This work |
| <b>SN442</b> | <i>orf19.4592 (HSX11)</i><br>mutant<br>prototroph             | <i>his1Δ/his1Δ, leu2Δ/leu2Δ, arg4Δ/arg4Δ::C.dublinsiensisARG4, URA3/ura3Δ::imm<sup>434</sup>, IRO1/iro1Δ::imm<sup>434</sup>, orf19.4592Δ::C.dublinsiensisHIS1/orf19.4592Δ::C.maltosaLEU2</i>             | This work |
| <b>SN444</b> | <i>orf19.260</i> mutant<br>prototroph                         | <i>his1Δ/his1Δ, leu2Δ/leu2Δ, arg4Δ/arg4Δ::C.dublinsiensisARG4, URA3/ura3Δ::imm<sup>434</sup>, IRO1/iro1Δ::imm<sup>434</sup>, orf19.260Δ::C.dublinsiensisHIS1/orf19.260Δ::C.maltosaLEU2</i>               | This work |
| <b>SN446</b> | <i>orf19.4831</i> mutant<br>prototroph                        | <i>his1Δ/his1Δ, leu2Δ/leu2Δ, arg4Δ/arg4Δ::C.dublinsiensisARG4, URA3/ura3Δ::imm<sup>434</sup>, IRO1/iro1Δ::imm<sup>434</sup>, orf19.4831Δ::C.dublinsiensisHIS1/orf19.4831Δ::C.maltosaLEU2</i>             | This work |
| <b>SN448</b> | <i>orf19.6327 (HET1)</i> mutant<br>prototroph                 | <i>his1Δ/his1Δ, leu2Δ/leu2Δ, arg4Δ/arg4Δ::C.dublinsiensisARG4, URA3/ura3Δ::imm<sup>434</sup>, IRO1/iro1Δ::imm<sup>434</sup>, orf19.6327Δ::C.dublinsiensisHIS1/orf19.6327Δ::C.maltosaLEU2</i>             | This work |

**Table S12 *C. albicans* mutants with reported virulence phenotypes that were recreated in this study**

| Mutant | Systematic name | Gene name     | Published virulence phenotype | Reference                      | Infectivity Screen      |                |
|--------|-----------------|---------------|-------------------------------|--------------------------------|-------------------------|----------------|
|        |                 |               |                               |                                | Defect in Boolean test? | t-test p value |
| 27     | orf19.1345      | <i>LIP8</i>   | Virulence defect              | PMID:17646357                  | no                      | 2.1E-03        |
| 45     | orf19.2156      | <i>NAG1</i>   | Virulence defect              | PMID:11298769                  | no                      | 9.8E-01        |
| 46     | orf19.2157      | <i>DAC1</i>   | Virulence defect              | PMID:11298769                  | no                      | 5.5E-03        |
| 73     | orf19.3380      | <i>HWP2</i>   | Virulence defect              | PMID:19616419                  | no                      | 1.0E-01        |
| 147    | orf19.7436      | <i>AAF1</i>   | Virulence defect              | PMID:10377090                  | Yes                     | 1.3E-12        |
| 225    | orf19.290       | <i>KRE5</i>   | Virulence defect              | PMID:15590817                  | Yes                     | 4.1E-01        |
| 249    | orf19.548       | <i>CDC10</i>  | Virulence defect              | PMID:16858141                  | Yes                     | 0.0E+00        |
| 282    | orf19.756       | <i>SAP7</i>   | Virulence defect              | PMID:16177393                  | no                      | 9.4E-01        |
| 307    | orf19.895       | <i>HOG1</i>   | Virulence defect              | PMID:10322006                  | Yes                     | 0.0E+00        |
| 308    | orf19.896       | <i>CHK1</i>   | Virulence defect              | PMID:10417206                  | no                      | 4.1E-01        |
| 318    | orf19.1036      | <i>MNS1</i>   | Virulence defect              | PMID:17933909                  | no                      | 5.3E-01        |
| 319    | orf19.1040      | <i>MAD2</i>   | Virulence defect              | PMID:12100546                  | Yes                     | 0.0E+00        |
| 360    | orf19.1373      | <i>INP51</i>  | Virulence defect              | PMID:18957583                  | Yes                     | 0.0E+00        |
| 397    | orf19.1671      | <i>UTR2</i>   | Virulence defect              | PMID:15042589<br>PMID:17074760 | Yes                     | 6.8E-06        |
| 406    | orf19.1760      | <i>RAS1</i>   | Virulence defect              | PMID:11722734                  | no                      | 6.7E-01        |
| 473    | orf19.2245      | <i>YPT72</i>  | Virulence defect              | PMID:19364843                  | no                      | 8.6E-02        |
| 497    | orf19.2444      | <i>CHS7</i>   | Virulence defect              | PMID:16079341                  | Yes                     | 5.7E-01        |
| 544    | orf19.2886      | <i>CEK1</i>   | Virulence defect              | PMID:9596738                   | no                      | 2.4E-01        |
| 582    | orf19.3201      | <i>MTLA1</i>  | Virulence defect              | PMID:17555440                  | Yes                     | 3.4E-07        |
| 624    | orf19.3575      | <i>CDC19</i>  | Virulence defect              | PMID:16681837                  | Yes                     | 2.2E-16        |
| 642    | orf19.3707      | <i>YHB1</i>   | Virulence defect              | PMID:15189992                  | no                      | 5.6E-01        |
| 643    | orf19.3710      | <i>YHB5</i>   | Virulence defect              | PMID:15189992                  | no                      | 6.4E-01        |
| 660    | orf19.3829      | <i>PHR1</i>   | Virulence defect              | PMID:7591097                   | Yes                     | 0.0E+00        |
| 671    | orf19.3912      | <i>GLN3</i>   | Virulence defect              | PMID:17950010                  | no                      | 5.1E-01        |
| 716    | orf19.4242      | <i>CST20</i>  | Virulence defect              | PMID:8917571                   | no                      | 1.4E-02        |
| 728    | orf19.4308      | <i>HSL1</i>   | Virulence defect              | PMID:15659158                  | Yes                     | 0.0E+00        |
| 742    | orf19.4424      | <i>PHO100</i> | Virulence defect              | PMID:19151328                  | no                      | 6.3E-01        |

|      |             |        |                     |                                |     |         |
|------|-------------|--------|---------------------|--------------------------------|-----|---------|
| 779  | orf19.4670  | CAS5   | Virulence defect    | PMID:19463063                  | no  | 7.3E-01 |
| 791  | orf19.4755  | KEX2   | Virulence defect    | PMID:12419804                  | Yes | 0.0E+00 |
| 796  | orf19.4785  | PTC1   | Virulence defect    | PMID:18708562                  | Yes | 6.8E-01 |
| 809  | orf19.4866  | CPP1   | Virulence defect    | PMID:9398674                   | Yes | 2.3E-03 |
| 812  | orf19.4890  | CLA4   | Virulence defect    | PMID:9259554                   | Yes | 0.0E+00 |
| 847  | orf19.5181  | NIK1   | Virulence defect    | PMID:11270409<br>PMID:10572127 | no  | 8.4E-01 |
| 851  | orf19.5200  | SIT4   | Virulence defect    | PMID:14731272                  | no  | 4.2E-01 |
| 873  | orf19.5399  | IFF11  | Virulence defect    | PMID:17371861                  | no  | 8.5E-01 |
| 904  | orf19.5662  | PEP7   | Virulence defect    | PMID:17005990                  | Yes | 5.4E-12 |
| 908  | orf19.5714  | SAP1   | Virulence defect    | PMID:9284116                   | no  | 3.1E-04 |
| 943  | orf19.6001  | SAP3   | Virulence defect    | PMID:9284116                   | no  | 2.2E-01 |
| 956  | orf19.6124  | ACE2   | Virulence defect    | PMID:15255906                  | Yes | 0.0E+00 |
| 960  | orf19.6202  | RBT4   | Virulence defect    | PMID:10978273                  | Yes | 1.1E-07 |
| 1063 | orf19.7150  | NRG1   | Virulence defect    | PMID:11532939                  | Yes | 2.1E-01 |
| 1074 | orf19.7247  | RIM101 | Virulence defect    | PMID:12524333<br>PMID:10992507 | no  | 8.7E-02 |
| 1094 | orf19.7374  | CTA4   | Virulence defect    | PMID:18083829                  | no  | 5.9E-01 |
| 1099 | orf19.7391  | OCH1   | Virulence defect    | PMID:16263704                  | no  | 3.1E-04 |
| 1107 | orf19.7472  | IFF4   | Virulence defect    | PMID:19347602                  | no  | 4.9E-01 |
| 1112 | orf19.7523  | MKC1   | Virulence defect    | PMID:9009353                   | no  | 3.3E-01 |
| 1133 | orf19.10341 | RFG1   | Virulence defect    | PMID:11259598                  | Yes | 0.0E+00 |
| 95   | orf19.4774  | AOX1   | Wild-type virulence | PMID:11368790                  | no  | 3.1E-03 |
| 123  | orf19.5636  | RBT5   | Wild-type virulence | PMID:10978273                  | no  | 7.9E-01 |
| 207  | orf19.173   |        | Wild-type virulence | PMID:19463063                  | no  | 5.6E-01 |
| 245  | orf19.469   | HST7   | Wild-type virulence | PMID:8917571                   | no  | 8.4E-01 |
| 388  | orf19.1621  | GPA2   | Wild-type virulence | PMID:15302825                  | Yes | 6.0E-09 |
| 395  | orf19.1665  | MNT1   | Wild-type virulence | PMID:15519997                  | no  | 8.9E-01 |
| 630  | orf19.3618  | YWP1   | Wild-type virulence | PMID:15870471                  | no  | 6.9E-01 |
| 638  | orf19.3680  | SEP7   | Wild-type virulence | PMID:12819094                  | no  | 3.7E-01 |
| 724  | orf19.4284  | BUR2   | Wild-type virulence | PMID:14500538                  | no  | 2.9E-12 |
| 1134 | orf19.10507 | XOG1   | Wild-type virulence | PMID:9308184                   | no  | 2.7E-03 |
